# Supplementary material for: Holistic View on Synthetic Natural Gas Production: A Technical, Economic and Environmental Analysis
Source: MDPI journal article supplement (doi:10.3390/en15051608), 2022-02-22
Supplement: s1 [file s1]

# Supplementary Materials for: “Holistic view on synthetic natural gas production: A technical, economic and environmental analysis”

Estefania Vega Puga <sup>1</sup>, Gkiokchan Moumin <sup>1</sup>, Nicole Carina Neumann <sup>1</sup>, Martin Roeb <sup>1</sup>, Armin Ardone <sup>2</sup> and Christian Sattler <sup>1</sup>

<sup>1</sup> Institute of Future Fuels, German Aerospace Center, Linder Hoehe, 51147 Cologne, Germany;

<sup>2</sup> Institute for Industrial Production, Karlsruhe Institute of Technology, Hertzstr. 16, 76187 Karlsruhe, Germany.

---

## Contents

|                                                           |    |
|-----------------------------------------------------------|----|
| 1. Process Simulation .....                               | 2  |
| 2. Determination of capital expenditures (CAPEX).....     | 3  |
| 3. Equipment sizing and cost .....                        | 3  |
| 4. Determination of operational expenditures (OPEX) ..... | 6  |
| 5. Base case net production cost estimation.....          | 7  |
| 6. SNG cost literature comparison .....                   | 9  |
| 7. Natural gas price .....                                | 11 |
| 8. Life Cycle Analysis – Background data.....             | 11 |
| References.....                                           | 18 |

# 1. Process Simulation

**Table S1: Stream tables of PtSNG plant's simulation.**

| Stream name | From  | To    | Phase  | Temperature [°C] | Pressure [bar] | Molar vapor fraction | Molar liquid fraction | Mass flow [kg/h] | Volume flow [m³/h] | Mole fractions   |                 |                |                 |       |                |
|-------------|-------|-------|--------|------------------|----------------|----------------------|-----------------------|------------------|--------------------|------------------|-----------------|----------------|-----------------|-------|----------------|
|             |       |       |        |                  |                |                      |                       |                  |                    | H <sub>2</sub> O | CO <sub>2</sub> | H <sub>2</sub> | CH <sub>4</sub> | T-OIL | O <sub>2</sub> |
| H2O         |       | PEM   | Liquid | 20               | 7              | 0                    | 1                     | 150.58           | 0.15               | 1                | 0               | 0              | 0               | 0     | 0              |
| H2          | PEM   | K-2   | Vapor  | 80               | 7              | 1                    | 0                     | 16.85            | 35.06              | 0                | 0               | 1              | 0               | 0     | 0              |
| O2          | PEM   |       | Vapor  | 80               | 7              | 1                    | 0                     | 133.73           | 17.53              | 0                | 0               | 0              | 0               | 0     | 1              |
| CO2         |       | K-1   | Vapor  | 20               | 55             | 1                    | 0                     | 91.95            | 0.93               | 0                | 1               | 0              | 0               | 0     | 0              |
| S3          | K-1   | K-2   | Vapor  | 20               | 7              | 1                    | 0                     | 91.95            | 7.28               | 0                | 1               | 0              | 0               | 0     | 0              |
| S4          | K-2   | HX-1  | Vapor  | 65               | 7              | 1                    | 0                     | 108.80           | 41.98              | 0                | 0.20            | 0.80           | 0               | 0     | 0              |
| S5          | HX-1  | R-1   | Vapor  | 270              | 7              | 1                    | 0                     | 108.80           | 67.40              | 0                | 0.20            | 0.80           | 0               | 0     | 0              |
| S6          | R-1   | HX-2  | Vapor  | 338              | 7              | 1                    | 0                     | 108.80           | 46.73              | 0.62             | 0.01            | 0.05           | 0.31            | 0     | 0              |
| S7          | HX-2  | ST-1  |        | 120              | 7              | 0.52                 | 0.48                  | 108.80           | 15.70              | 0.62             | 0.01            | 0.05           | 0.31            | 0     | 0              |
| S8          | ST-1  |       | Liquid | 120              | 7              | 0                    | 1                     | 55.58            | 0.06               | 0.99             | 0.00            | 0.00           | 0.00            | 0     | 0              |
| S9          | ST-1  | HX-3  | Vapor  | 120              | 7              | 1                    | 0                     | 53.22            | 15.67              | 0.28             | 0.02            | 0.10           | 0.60            | 0     | 0              |
| S10         | HX-3  | R-2   | Vapor  | 260              | 7              | 1                    | 0                     | 53.22            | 21.25              | 0.28             | 0.02            | 0.10           | 0.60            | 0     | 0              |
| S11         | R-2   | HX-3  | Vapor  | 282              | 7              | 1                    | 0                     | 53.22            | 21.31              | 0.33             | 0.01            | 0.03           | 0.64            | 0     | 0              |
| S12         | HX-3  | HX-4  | Vapor  | 142              | 7              | 1                    | 0                     | 53.22            | 15.94              | 0.33             | 0.01            | 0.03           | 0.64            | 0     | 0              |
| S13         | HX-4  | ST-2  |        | 30               | 7              | 0.67                 | 0.33                  | 53.22            | 7.78               | 0.33             | 0.01            | 0.03           | 0.64            | 0     | 0              |
| S14         | ST-2  |       | Liquid | 30               | 7              | 0                    | 1                     | 19.40            | 0.02               | 0.99             | 0.00            | 0.00           | 0.01            | 0     | 0              |
| S15         | ST-2  | CO-1  | Vapor  | 30               | 7              | 1                    | 0                     | 33.82            | 7.75               | 0.00             | 0.01            | 0.04           | 0.95            | 0     | 0              |
| S16         | CO-1  | HX-5  | Vapor  | 107              | 16             | 1                    | 0                     | 33.82            | 4.24               | 0.00             | 0.01            | 0.04           | 0.95            | 0     | 0              |
| SNG         | HX-5  |       | Vapor  | 30               | 16             | 1                    | 0                     | 33.82            | 3.38               | 0.00             | 0.01            | 0.04           | 0.95            | 0     | 0              |
| A1          | R-1   | HX-1  | Liquid | 337              | 1              | 0                    | 1                     | 1000             | 1.28               | 0                | 0               | 0              | 0               | 1     | 0              |
| A2          | HX-1  | HX-R1 | Liquid | 312              | 1              | 0                    | 1                     | 1000             | 1.25               | 0                | 0               | 0              | 0               | 1     | 0              |
| A3          | HX-R1 | R-1   | Liquid | 200              | 1              | 0                    | 1                     | 1000             | 1.13               | 0                | 0               | 0              | 0               | 1     | 0              |
| A4          | HX-R2 | R-2   | Liquid | 250              | 1              | 0                    | 1                     | 100              | 0.12               | 0                | 0               | 0              | 0               | 1     | 0              |
| A5          | R-2   | HX-R2 | Liquid | 282              | 1              | 0                    | 1                     | 100              | 0.12               | 0                | 0               | 0              | 0               | 1     | 0              |

## 2. Determination of capital expenditures (CAPEX)

The fixed capital investment (FCI) is determined as per Eq. (S1), where  $EC_e$  represents the equipment cost and  $F_j$  Lang factors based on typical values for the chemical industry. Lang factors are summarized in the following table.

$$FCI = \sum_{k=1}^m EC_e \left( 1 + \sum_{j=1}^{12} F_{e,j} \right) \quad (S1)$$

**Table S2: Lang-factors for estimating FCI on the basis of EC, adapted from Peters, et al. [1]**

| Capital cost item     | $j$ | Electrochemical<br>equipment Lang-factor<br>$F_j$ | Thermochemical<br>equipment Lang-factor.<br>$F_j$ |
|-----------------------|-----|---------------------------------------------------|---------------------------------------------------|
| <i>Direct costs</i>   |     |                                                   |                                                   |
| Installation          | 1   | 0.47                                              | 0.47                                              |
| Instrumentation       | 2   | 0.00                                              | 0.36                                              |
| Piping                | 3   | 0.00                                              | 0.68                                              |
| Power supply          | 4   | 0.00                                              | 0.11                                              |
| Building              | 5   | 0.00                                              | 0.18                                              |
| Yard improvements     | 6   | 0.10                                              | 0.10                                              |
| Service facilities    | 7   | 0.00                                              | 0.70                                              |
| <i>Indirect costs</i> |     |                                                   |                                                   |
| Engineering and       | 8   | 0.00                                              | 0.33                                              |
| Construction expenses | 9   | 0.00                                              | 0.41                                              |
| Legal expenses        | 10  | 0.04                                              | 0.04                                              |
| Contractor's fee      | 11  | 0.22                                              | 0.22                                              |
| Contingency           | 12  | 0.44                                              | 0.44                                              |

## 3. Equipment sizing and cost

Detailed information on:

### Heat exchangers

The sizing of the heat exchanger network was carried out based on the calculation of the heat transfer area  $A$  using the correlation shown in Eq. (S2).

$$\dot{Q} = A \times k \times \Delta T_{ln}, \quad (S2)$$

where  $k$  is the heat transfer coefficient,  $\dot{Q}$  the heat duty and  $\Delta T_{ln}$  the logarithmic mean temperature difference.  $\Delta T_{ln}$  is defined by:

$$\Delta T_{ln} = \frac{(T_{h,1} - T_{c,1}) - (T_{h,2} - T_{c,2})}{\ln \left[ \frac{(T_{h,1} - T_{c,1})}{(T_{h,2} - T_{c,2})} \right]}, \quad (S3)$$

where the index  $h$  refers to the hot fluid,  $c$  to the cold fluid, 1 to inlet conditions, and 2 to outlet conditions. The heat transfer coefficient was estimated from Ulrich and Vasudevan [2], while the heat duty was extracted from Aspen Plus®.

## Reactors

The methanation reactors were modelled as shell and tube heat exchangers. However, their sizing was determined based on the mean residence time, as discussed in Section 2.1.2. of the main text. Reactor R-1 and reactor R-2 each have 20 tubes of 7.5 cm diameter and respective lengths of 85 cm and 45 cm.

## Separators

The lengths and diameters of both process vessels, ST-1 and ST-2, were determined by using the sizing function from Aspen Plus®. In both cases the flash drums are horizontally oriented and the length-to-diameter ratio is three, coinciding with design guidelines of Ulrich and Vasudevan [2] for gas to liquid separators operating at low pressure (< 10 bar).

## Compressor

The shaft power of the centrifugal compressor and the fluid power were determined from the Aspen Plus® simulation. The pressure ratio is less than 4:1 and therefore staged compression is not required.

## Electrolyser

The selected electrolyser is a 1 MW<sub>el</sub> commercially available PEM electrolyser. Since Ulrich and Vasudevan [2] do not include costs for electrochemical equipment in their book, the cost of the electrolyser was extracted from the IndWEDe study published by NOW GmbH [3]. This study reports a cost of 700 €/kW for AEL and 1460 €/kW for PEMEL in 2018. Details of all the equipment sizing are provided in Table S3.

**Table S3: Summary of plant equipment sizing.**

| Unit                               | Characteristic input 1            | Characteristic input 2 | Characteristic input 3 |
|------------------------------------|-----------------------------------|------------------------|------------------------|
| <i>Compressor</i>                  |                                   |                        |                        |
| Gas compressor (CO-1) <sup>a</sup> | Fluid power: 10 kW                |                        |                        |
|                                    | Shaft power: 1,805 kW             |                        |                        |
| <i>Electrolyser</i>                |                                   |                        |                        |
| PEM Electrolyser                   | Nominal power: 1000 kW            |                        |                        |
| <i>Heat Exchangers</i>             |                                   |                        |                        |
| Heat Exchanger 1 (HX-1)            | Surface area: 0.40 m <sup>2</sup> | Pressure: 7 bar        |                        |
| Heat Exchanger 2 (HX-2)            | Surface area: 1.15 m <sup>2</sup> | Pressure: 7 bar        |                        |
| Heat Exchanger 3 (HX-3)            | Surface area: 0.43 m <sup>2</sup> | Pressure: 7 bar        |                        |
| Heat Exchanger 4 (HX-4)            | Surface area: 1.91 m <sup>2</sup> | Pressure: 7 bar        |                        |
| Heat Exchanger 5 (HX-5)            | Surface area: 0.10 m <sup>2</sup> | Pressure: 16 bar       |                        |
| <i>Reactors</i>                    |                                   |                        |                        |
| Methanation Reactor 1 (R-1)        | Surface area: 3.86 m <sup>2</sup> | Pressure: 7 bar        |                        |
| Methanation Reactor 2 (R-2)        | Surface area: 2.12 m <sup>2</sup> | Pressure: 7 bar        |                        |
| <i>Separators</i>                  |                                   |                        |                        |
| Separator 1 *                      | Length: 2.75 m                    | Diameter: 0.91 m       | Pressure: 7 bar        |
| Separator 2 *                      | Length: 2.75 m                    | Diameter: 0.91 m       | Pressure: 7 bar        |

\*Characteristic values for equipment sizing were extracted from Aspen Plus® process simulation

**Table S4: Equipment cost estimation parameters.**

| Unit                         | Base<br>equipment cost<br>2004, $C_{2004}^0$ (\$) | Base<br>equipment cost<br>2018, $C_{2018}^0$ (€) <sup>d</sup> | Material<br>factor $F_M^{SS}$ | Pressure<br>factor $F_P$ | Equipment<br>cost 2018,<br>$C_{2018}^{SS}$ (€) |
|------------------------------|---------------------------------------------------|---------------------------------------------------------------|-------------------------------|--------------------------|------------------------------------------------|
| Compressor <sup>a</sup>      |                                                   |                                                               |                               |                          |                                                |
| Gas compressor (CO-1)        | \$15,000.00                                       | 17,262.07 €                                                   | 4.4                           | 1.0                      | 76,419.20 €                                    |
|                              | \$270.00                                          | 310.72 €                                                      |                               |                          |                                                |
| Electrolyser                 |                                                   |                                                               |                               |                          |                                                |
| PEM Electrolyser             |                                                   |                                                               |                               |                          | 1,460,000.00 €                                 |
| Heat Exchangers <sup>b</sup> |                                                   |                                                               |                               |                          |                                                |
| Heat Exchanger 1 (HX-1)      | \$1,600.00                                        | 1,841.29 €                                                    | 3.0                           | 1.0                      | 5,523.86 €                                     |
| Heat Exchanger 2 (HX-2)      | \$1,900.00                                        | 2,186.53 €                                                    | 3.0                           | 1.0                      | 6,559.59 €                                     |
| Heat Exchanger 3 (HX-3)      | \$1,600.00                                        | 1,841.29 €                                                    | 3.0                           | 1.0                      | 5,523.86 €                                     |
| Heat Exchanger 4 (HX-4)      | \$2,500.00                                        | 2,877.01 €                                                    | 3.0                           | 1.0                      | 8,631.04 €                                     |
| Heat Exchanger 5 (HX-5)      | \$1,600.00                                        | 1,841.29 €                                                    | 3.0                           | 1.0                      | 5,523.86 €                                     |
| Reactors <sup>b</sup>        |                                                   |                                                               |                               |                          |                                                |
| Reactor 1 (R-1)              | \$3,500.00                                        | 4,027.82 €                                                    | 3.0                           | 1.0                      | 12,083.45 €                                    |
| Reactor 2 (R-2)              | \$3,500.00                                        | 4,027.82 €                                                    | 3.0                           | 1.0                      | 12,083.45 €                                    |
| Separators <sup>c</sup>      |                                                   |                                                               |                               |                          |                                                |
| Separator 1                  | \$3,500.00                                        | 4,027.82 €                                                    | 2.5                           | 1.5                      | 15,104.32 €                                    |
| Separator 2                  | \$3,500.00                                        | 4,027.82 €                                                    | 2.5                           | 1.5                      | 15,104.32 €                                    |

All data was extracted from Ulrich and Vasudevan [2], details of the exact source are given below:

<sup>a</sup> Compressor cost is divided in driver (motor) cost and the compressor cost. Driver cost was extracted from Figure 5.20 and an installation factor of 1.5 was considered. The compressor cost was obtained from Figure 5.30.

<sup>b</sup> Values were gathered from Figure 5.36

<sup>c</sup> Values were extracted from Figure 5.44 and Figure 5.45

<sup>d</sup> Calculated utilizing  $CEPCI_{2004} = 444.2$  € and  $CEPCI_{2018} = 603.1$  €

#### 4. Determination of operational expenditures (OPEX)

To estimate a fix production cost of item  $y$ , a corresponding ratio factor  $W_y$  was multiplied by a defined basis  $B_y$ . The total OPEX amounts to the sum of all cost items  $y$ .

**Table S5: Method for the estimation of fixed production costs.**

| Fixed production cost item     | $y$ | Factor $W_y$ | Basis $B_y$                       |
|--------------------------------|-----|--------------|-----------------------------------|
| Insurance and taxes            | 1   | 0.02         | FCI                               |
| Maintenance labour (ML)        | 2   | 0.01         | FCI-CAPEX <sub>electrolyser</sub> |
| Maintenance material (MM)      | 3   | 0.01         | FCI-CAPEX <sub>electrolyser</sub> |
| Maintenance electrolyser       | 4   |              | 12.50 €/kW*                       |
| Operating supplies (OS)        | 5   | 0.15         | ML+MM                             |
| Operating labour (OL)          | 6   |              |                                   |
| Operating supervision (OV)     | 7   | 0.15         | OL                                |
| Laboratory charges             | 8   | 0.20         | OL                                |
| Plant overhead costs (PO)      | 9   | 0.50         | OL+OV+OS                          |
| Administrative costs           | 10  | 0.25         | PO                                |
| Distribution and selling costs | 11  | 0.00         | NPC                               |
| Research and development costs | 12  | 0.00         | NPC                               |

\*Maintenance of electrolyser amounts to 12.50 €/kW for PEMEL and 18 €/kW for AEL in 2018 [3]

## 5. Base case net production cost estimation

Following the method described in the main text the net production cost (NPC) of produced SNG in the base case was calculated. The following Table S6 provides the detailed values and assumptions used in the aforementioned calculation.

**Table S6: Base case NPC estimation summary.**

| Capital costs                |                                         | Yield estimate                    |                     |
|------------------------------|-----------------------------------------|-----------------------------------|---------------------|
|                              | <u>k€</u>                               |                                   |                     |
| Direct Capital Costs         | 2,877.41                                | Annual operating hours (h/y)      | 8000                |
| Indirect Capital Costs       | 1,256.08                                | SNG mass flow rate (kg/h)         | 33.82               |
| Fixed Capital Investment     | 4,133.49                                | SNG higher heating value (kWh/kg) | 15.18               |
| Working Capital              | 729.44                                  | Annual SNG prod. estimate (kWh/y) | 4,106,744           |
| Total Capital Investment     | 4,862.93                                |                                   |                     |
| Raw materials                |                                         |                                   |                     |
|                              | <u>Units</u>                            | <u>Units/y</u>                    | <u>Price €/unit</u> |
| Distilled Water              | t                                       | 1,204.62                          | 1                   |
| CO <sub>2</sub>              | t                                       | 735.64                            | 20                  |
| Catalyst                     | kg                                      | 13.44                             | 1288                |
| Total raw materials          |                                         |                                   | 33.22               |
| Utilities                    |                                         |                                   |                     |
|                              | <u>Units</u>                            | <u>Units/y</u>                    | <u>Price €/unit</u> |
| Electricity                  | MWh                                     | 8,014.44                          | 50                  |
| Cooling water                | t                                       | 46,308.50                         | 0                   |
| Total utilities              |                                         |                                   | 400.72              |
| Fixed operational costs      |                                         |                                   |                     |
| Operating labour (OL)        | 3 shifts 1 operators/shift              | 66 693€/operator/yr               | <u>k€/y</u>         |
| Insurance and taxes          | 2% of FCI                               |                                   | 200.08              |
| Maintenance labour (ML)      | 1% of FCI-CAPEX <sub>electrolyser</sub> |                                   | 82.67               |
| Maintenance material (MM)    | 1% of FCI-CAPEX <sub>electrolyser</sub> |                                   | 8.19                |
| Maintenance PEM electrolyser | 12,50                                   | €/kWh                             | 8.19                |
| Operating supplies (OS)      | 15% of ML+MM                            |                                   | 12.50               |
| Operating supervision (OV)   | 15% of OL                               |                                   | 2.46                |
| Laboratory charges           | 20% of OL                               |                                   | 30.01               |
| Plant overhead costs (PO)    | 50% of OL+OV+OS                         |                                   | 40.02               |
| Administrative costs         | 25% of PO                               |                                   | 116.27              |
| Fixed cost of production     |                                         |                                   | 29.07               |
|                              |                                         |                                   | 529.46              |
| Annualized capital charges   |                                         |                                   |                     |
|                              | <u>k€</u>                               | <u>Interest Rate</u>              | <u>Life (y)</u>     |
| Fixed Capital Investment     | 4,133.49                                | 5%                                | 20                  |
|                              |                                         |                                   | <u>AACR</u>         |
|                              |                                         |                                   | 0.0802              |
|                              |                                         |                                   | <u>k€/y</u>         |
|                              |                                         |                                   | 331.68              |
| Summary                      |                                         |                                   |                     |
|                              |                                         |                                   | <u>k€/y</u>         |
|                              |                                         | Variable cost of production       | 443.95              |
|                              |                                         | Fixed cost of production          | 529.46              |
|                              |                                         | Annual capital charge             | 331.68              |
|                              |                                         | Total annualized cost             | 1,295.09            |
|                              |                                         | Net production cost (€/kWh)       | 0.32                |

### **Sale of by-products**

Since the PtSNG plant produces not only SNG but also as by-products oxygen and heat, both of which can be sold to obtain an economic gain. It is assumed that oxygen will be sold at 70% of its conventional purchase price of 50 €/t to account for the pilot plant's electrical consumption during oxygen compression [4]. On the other hand, the price of heat provision was determined by analogy with biogas plants. An empirical study conducted in Germany showed that the prices for heat provision from biogas plants differed substantially from free to maximum of 90 €/MWh [5]. To keep the values as close to reality as possible, the average heat supply price reported in the aforementioned study was selected. All heat sources (electrolyser and methanation reactors) are considered with the same price



## 6. SNG cost literature comparison

**Table S7: Compilation of literature utilized for the SNG cost comparison.**

| Source                    | Operating hours | Assumptions                                                                                                          | Year | SNG Cost (€/kWh <sub>SNG</sub> ) | CAPEX                              | OPEX (€/kW <sub>SNG</sub> )                                                | Cost estimation method                                                                                        |
|---------------------------|-----------------|----------------------------------------------------------------------------------------------------------------------|------|----------------------------------|------------------------------------|----------------------------------------------------------------------------|---------------------------------------------------------------------------------------------------------------|
| Becker, et al. [6]        | 7,740           | 66 MW <sub>H2</sub> / 51 MW <sub>SNG</sub> capacity                                                                  | 2013 | 0.06–0.18                        | 1,045                              | 80.7                                                                       | H2A tool developed by the National Renewable Energy Laboratory. 15% working capital                           |
|                           | 5,590           | No electrolysis                                                                                                      |      | 0.15                             | €/kW <sub>SNG</sub>                | 4.14 M€                                                                    |                                                                                                               |
|                           | 3,440           | Free electricity<br>40y plant lifetime                                                                               |      | 0.132                            |                                    | 8.4% of total installed cost                                               |                                                                                                               |
| Benjaminsson, et al. [7]  | 8,600           | 1 MW <sub>el</sub> capacity                                                                                          | 2014 | 0.14–0.24                        | 6,500–8,666                        | 468–624                                                                    | Based on cost estimated on contact with equipment suppliers                                                   |
|                           |                 | Alkaline electrolysis<br>Electricity 30 €/MWh<br>Free CO <sub>2</sub>                                                |      |                                  | €/kW <sub>SNG</sub><br>7.8–10.4 M€ | 234–312 k€<br>Maintenance and service<br>3% of investment                  |                                                                                                               |
| De Saint Jean, et al. [8] | 4,500           | 1 MW <sub>el</sub> capacity<br>SOEC electrolysis<br>Electricity 0–50 €/MWh                                           | 2014 | 0.42–0.58                        | 7,070–9,630<br>€/kW <sub>SNG</sub> | 664–9,144<br>Maintenance 4% of investment, tax 2%. 0.2 operators required  | The Chauvet method excluded working capital                                                                   |
| Giglio, et al. [9]        | 8,000           | 10 MW <sub>el</sub> capacity<br>Steam and co-electrolysis<br>Electricity 0–65 €/MWh<br>CO <sub>2</sub> cost 4–88 €/t | 2011 | 0.05–0.18                        | 700–800<br>€/kW <sub>SNG</sub>     | 38–40<br>Maintenance: 2% of total plant cost. considers one plant operator | Methodology developed by NETL, several levels of capital cost were calculated. Includes capital for inventory |
| Jentsch, et al. [10]      |                 | 6-12 GW capacity                                                                                                     | 2014 | 0.05                             | 750<br>€/kW <sub>SNG</sub>         | Fixed Operating costs 4% of investment costs                               | Investment cost, fixed operating costs, interest rate, depreciation method                                    |

| Source                 | Operating hours | Assumptions                                                                                                                                 | Year | SNG Cost (€/kWh <sub>SNG</sub> ) | CAPEX                                   | OPEX (€/kW <sub>SNG</sub> )                                                     | Cost estimation method                                                                        |
|------------------------|-----------------|---------------------------------------------------------------------------------------------------------------------------------------------|------|----------------------------------|-----------------------------------------|---------------------------------------------------------------------------------|-----------------------------------------------------------------------------------------------|
| Mohseni, et al. [11]   | 8,000           | 2.5 MW <sub>el</sub> or 1.2 MW <sub>SNG</sub><br>Alkaline electrolysis<br>Sale of heat and oxygen<br>Free CO <sub>2</sub>                   | 2014 | 0.13                             | 1,516<br>€/kW <sub>SNG</sub><br>1.82 M€ | 1,095<br>O&M are 5% of investment                                               | Uses cost estimation tool CAPCOST, a set price for SNG is determined                          |
| Parra and Patel [12]   | 8,000           | 0.01–1000 MW <sub>el</sub> capacity<br>PEM electrolyser<br>Revenue for frequency control<br>Sale of heat and oxygen<br>Free CO <sub>2</sub> | 2016 | 0.1–0.25                         | 0.07–141 M€                             | O&M cost is 5% of CAPEX for methanation and 2% for electrolyser. BoP OPEX is 7% | Calculated total levelized cost. Used the cost curve method to account for scale dependencies |
| Peters, et al. [13]    | 8,000           | 13.2 MW <sub>SNG</sub> capacity<br>No electrolysis<br>CO <sub>2</sub> cost 80–800€/t                                                        | 2019 | 0.25–0.47                        | 649–1,274<br>€/kW <sub>SNG</sub>        | 2,140–3,827                                                                     | Cost of manufacture by using Lang factors and initial equipment cost. Working capital 15%     |
| Schiebahn, et al. [14] | 3,000           | 84 GW <sub>el</sub> capacity<br>PEM Electrolysis<br>Free CO <sub>2</sub>                                                                    | 2015 | 0.23                             | 1,809<br>€/kW <sub>SNG</sub>            | Operation and maintenance are 3% of total investment                            | Cost estimated based in component scaling and process design                                  |
| Tremel, et al. [15]    | 6,000           | 32 MW <sub>SNG</sub> capacity<br>No electrolysis                                                                                            | 2015 | 0.17                             | 1,000<br>€/kW <sub>SNG</sub>            | Operation and maintenance are 4% of total investment per year                   | Used cost curve method to account for scaling effects.                                        |
| Tichler, et al. [16]   | 5,630           | 1–10 MW <sub>el</sub> capacity<br>Alkaline electrolysis<br>Electricity 33–105 €/MWh<br>CO <sub>2</sub> cost 30–90 €/t                       | 2013 | 0.26–0.44                        | 1,500–2,197<br>€/kW <sub>el</sub>       |                                                                                 |                                                                                               |

## 7. Natural gas price

Table S8 reports the German natural gas market price for private and industrial customers as well as the cross-border price, for 2017, 2021 (first half), and its average in this period. Industrial and private customers have seen a price development without major fluctuations between 2017 and 2021, and their taxes amounted to 33% of the price shown in Table S8.

**Table S8: Natural gas price in Germany. Prices include taxes for private and industrial customers, but not for cross-border.**

| Type of tariff       | Price 2017<br>(€-cent/kWh) | Price 2021<br>(1 <sup>st</sup> half)<br>(€-cent/kWh) | Average price<br>2017 – 2019<br>(€-cent/kWh) | Source        |
|----------------------|----------------------------|------------------------------------------------------|----------------------------------------------|---------------|
| Private customers    | 6.11                       | 6.47                                                 | 6.13                                         | Eurostat [17] |
| Industrial customers | 3.72                       | 3.95                                                 | 3.72                                         | Eurostat [18] |
| Cross-border         | 1.70                       | 2.30                                                 | -                                            | BAFA [19]     |

## 8. Life Cycle Analysis – Background data

The electricity source plays a major role regarding the global warming potential of SNG. Thus, different electricity scenarios were defined according to Table S9.

**Table S9: Definition of electricity scenarios in the life cycle analysis.**

| Electricity scenario          | Global warming potential in g CO <sub>2</sub> -eq/kWh | Specification                                                                      | Name of data set (ecoinvent 3.7.1 cut-off)                                                                                                 | Source                                                                 |
|-------------------------------|-------------------------------------------------------|------------------------------------------------------------------------------------|--------------------------------------------------------------------------------------------------------------------------------------------|------------------------------------------------------------------------|
| <b>German grid mix</b>        | 619.66                                                | Shares of electricity technology are based on IEA World Energy Statistics for 2017 | market for electricity, medium voltage   electricity, medium voltage   Cutoff, U(DE)                                                       | ecoinvent 3.7.1 cut-off                                                |
| <b>Wind Mix</b>               | 26.51                                                 | 20% offshore wind power                                                            | electricity production, wind, 1-3 MW turbine, offshore   electricity, high voltage   Cutoff, U(DE)                                         | Umweltbundesamt [20]                                                   |
|                               |                                                       | 80% onshore wind power                                                             | electricity production, wind, >3 MW turbine, onshore   electricity, high voltage   Cutoff, U(DE)                                           |                                                                        |
|                               |                                                       | Transmission losses (high-to-medium voltage): 0.37%                                | see market for electricity, medium voltage   electricity, medium voltage   Cutoff, U(DE)                                                   | ecoinvent 3.7.1 cut-off                                                |
| <b>Wind offshore</b>          | 14.43                                                 | 100% offshore wind power                                                           | electricity production, wind, 1-3 MW turbine, offshore   electricity, high voltage   Cutoff, U(DE)                                         | ecoinvent 3.7.1 cut-off                                                |
|                               |                                                       | Transmission losses (high-to-medium voltage): 0.37%                                | see market for electricity, medium voltage   electricity, medium voltage   Cutoff, U(DE)                                                   |                                                                        |
| <b>PV Mix</b>                 | 93.91                                                 | 75% PV on roof                                                                     | electricity production, photovoltaic, 3 kW slanted-roof installation, multi-Si, panel, mounted   electricity, low voltage   Cutoff, U (DE) | BMW i [21]                                                             |
|                               |                                                       | 25% PV on open ground                                                              | electricity production, photovoltaic, 570 kW open ground installation, multi-Si   electricity, low voltage   Cutoff, U (DE)                |                                                                        |
| <b>German grid mix (2030)</b> | 368.81                                                | 10.2% Lignite                                                                      | electricity production, lignite   electricity, high voltage   Cutoff, U(DE)                                                                | Revolution Scenario for 2030 in EWI Energy Research and Scenarios [22] |
|                               |                                                       | 8.6% Hard coal                                                                     | electricity production, hard coal   electricity, high voltage   Cutoff, U(DE)                                                              |                                                                        |
|                               |                                                       | 12.5% Gas                                                                          | electricity production, natural gas, combined cycle power plant   electricity, high voltage   Cutoff, U(DE)                                |                                                                        |
|                               |                                                       | 2.4% Oil                                                                           | electricity production, oil   electricity, high voltage   Cutoff, U(DE)                                                                    |                                                                        |

|                        |        |                                                                                                                                                                       |                                                                                                                                    |                                                                        |
|------------------------|--------|-----------------------------------------------------------------------------------------------------------------------------------------------------------------------|------------------------------------------------------------------------------------------------------------------------------------|------------------------------------------------------------------------|
|                        |        | 3.7% Hydropower                                                                                                                                                       | electricity production, hydro, run-of-river   electricity, high voltage   Cutoff, U(DE)                                            |                                                                        |
|                        |        | 7.7% Biomass                                                                                                                                                          | heat and power co-generation, wood chips, 6667 kW, state-of-the-art 2014   electricity, high voltage   Cutoff, U(DE)               |                                                                        |
|                        |        | 32.6% Wind onshore                                                                                                                                                    | electricity production, wind, >3 MW turbine, onshore   electricity, high voltage   Cutoff, U(DE)                                   |                                                                        |
|                        |        | 8.6% Wind offshore                                                                                                                                                    | electricity production, wind, 1-3 MW turbine, offshore   electricity, high voltage   Cutoff, U(DE)                                 |                                                                        |
|                        |        | 13.3% PV                                                                                                                                                              | electricity production, photovoltaic, 570kWp open ground installation, multi-Si   electricity, low voltage   Cutoff, U(DE)         |                                                                        |
|                        |        | 1.13E-7 kg SF6/kWh                                                                                                                                                    | sulfur hexafluoride production, liquid   sulfur hexafluoride, liquid   Cutoff, U (RER)                                             | ecoinvent 3.7.1 cut-off                                                |
|                        |        | Transmission network, high voltage: 6.582E-09 km/kWh                                                                                                                  | market for transmission network, electricity, high voltage   transmission network, electricity, high voltage   Cutoff, U (GLO)     |                                                                        |
|                        |        | Transmission network, medium voltage: 1.863E-8 km/kWh                                                                                                                 | market for transmission network, electricity, medium voltage   transmission network, electricity, medium voltage   Cutoff, U (GLO) |                                                                        |
|                        |        | Transmission network, long-distance: 3.17E-10 km/kWh                                                                                                                  | market for transmission network, long-distance   transmission network, long-distance   Cutoff, U (GLO)                             |                                                                        |
|                        |        | Transmission losses (high-to-medium voltage): 0.37%<br>N <sub>2</sub> O emission: 5.0E-6 kg/kWh<br>Ozone emissions: 4.1577E-6 kg/kWh<br>SF6 emissions: 1.13E-7 kg/kWh | see market for electricity, medium voltage   electricity, medium voltage   Cutoff, U(DE)                                           |                                                                        |
| German grid mix (2040) | 222.38 | 4.5% Lignite                                                                                                                                                          | electricity production, lignite   electricity, high voltage   Cutoff, U(DE)                                                        | Revolution Scenario for 2040 in EWI Energy Research and Scenarios [22] |
|                        |        | 2.8% Hard coal                                                                                                                                                        | electricity production, hard coal   electricity, high voltage   Cutoff, U(DE)                                                      |                                                                        |
|                        |        | 9.4% Gas                                                                                                                                                              | electricity production, natural gas, combined cycle power plant   electricity, high voltage   Cutoff, U(DE)                        |                                                                        |

|                        |        |                                                                                                                                                                       |                                                                                                                                    |                                            |
|------------------------|--------|-----------------------------------------------------------------------------------------------------------------------------------------------------------------------|------------------------------------------------------------------------------------------------------------------------------------|--------------------------------------------|
|                        |        | 1.3% Oil                                                                                                                                                              | electricity production, oil   electricity, high voltage   Cutoff, U(DE)                                                            |                                            |
|                        |        | 3% Hydropower                                                                                                                                                         | electricity production, hydro, run-of-river   electricity, high voltage   Cutoff, U(DE)                                            |                                            |
|                        |        | 7.5% Biomass                                                                                                                                                          | heat and power co-generation, wood chips, 6667 kW, state-of-the-art 2014   electricity, high voltage   Cutoff, U(DE)               |                                            |
|                        |        | 39.9% Wind onshore                                                                                                                                                    | electricity production, wind, >3 MW turbine, onshore   electricity, high voltage   Cutoff, U(DE)                                   |                                            |
|                        |        | 13.1% Wind offshore                                                                                                                                                   | electricity production, wind, 1-3 MW turbine, offshore   electricity, high voltage   Cutoff, U(DE)                                 |                                            |
|                        |        | 18.6% PV                                                                                                                                                              | electricity production, photovoltaic, 570 kW open ground installation, multi-Si   electricity, low voltage   Cutoff, U(DE)         |                                            |
|                        |        | 1.13E-7 kg SF6/kWh                                                                                                                                                    | sulfur hexafluoride production, liquid   sulfur hexafluoride, liquid   Cutoff, U (RER)                                             | ecoinvent 3.7.1 cut-off                    |
|                        |        | Transmission network, high voltage: 6.582E-09 km/kWh                                                                                                                  | market for transmission network, electricity, high voltage   transmission network, electricity, high voltage   Cutoff, U (GLO)     |                                            |
|                        |        | Transmission network, medium voltage: 1.863E-8 km/kWh                                                                                                                 | market for transmission network, electricity, medium voltage   transmission network, electricity, medium voltage   Cutoff, U (GLO) |                                            |
|                        |        | Transmission network, long-distance: 3.17E-10 km/kWh                                                                                                                  | market for transmission network, long-distance   transmission network, long-distance   Cutoff, U (GLO)                             |                                            |
| German grid mix (2050) | 127.15 | Transmission losses (high-to-medium voltage): 0.37%<br>N <sub>2</sub> O emission: 5.0E-6 kg/kWh<br>Ozone emissions: 4.1577E-6 kg/kWh<br>SF6 emissions: 1.13E-7 kg/kWh | see market for electricity, medium voltage   electricity, medium voltage   Cutoff, U(DE)                                           | Revolution Scenario for 2050 in EWI Energy |
|                        |        | 9.6% Gas                                                                                                                                                              | electricity production, natural gas, combined cycle power plant   electricity, high voltage   Cutoff, U(DE)                        |                                            |
|                        |        | 3.3% Hydropower                                                                                                                                                       | electricity production, hydro, run-of-river   electricity, high voltage   Cutoff, U(DE)                                            |                                            |

|  |  |                                                                                                                                                                       |                                                                                                                                    |                             |
|--|--|-----------------------------------------------------------------------------------------------------------------------------------------------------------------------|------------------------------------------------------------------------------------------------------------------------------------|-----------------------------|
|  |  | 6.7% Biomass                                                                                                                                                          | heat and power co-generation, wood chips, 6667 kW, state-of-the-art 2014   electricity, high voltage   Cutoff, U(DE)               | Research and Scenarios [22] |
|  |  | 42.6% Wind onshore                                                                                                                                                    | electricity production, wind, >3 MW turbine, onshore   electricity, high voltage   Cutoff, U(DE)                                   |                             |
|  |  | 15.9% Wind offshore                                                                                                                                                   | electricity production, wind, 1-3 MW turbine, offshore   electricity, high voltage   Cutoff, U(DE)                                 |                             |
|  |  | 21.9% PV                                                                                                                                                              | electricity production, photovoltaic, 570 kW open ground installation, multi-Si   electricity, low voltage   Cutoff, U(DE)         |                             |
|  |  | 1.13E-7 kg SF6/kWh                                                                                                                                                    | sulfur hexafluoride production, liquid   sulfur hexafluoride, liquid   Cutoff, U (RER)                                             | ecoinvent 3.7.1 cut-off     |
|  |  | Transmission network, high voltage: 6.582E-09 km/kWh                                                                                                                  | market for transmission network, electricity, high voltage   transmission network, electricity, high voltage   Cutoff, U (GLO)     |                             |
|  |  | Transmission network, medium voltage: 1.863E-8 km/kWh                                                                                                                 | market for transmission network, electricity, medium voltage   transmission network, electricity, medium voltage   Cutoff, U (GLO) |                             |
|  |  | Transmission network, long-distance: 3.17E-10 km/kWh                                                                                                                  | market for transmission network, long-distance   transmission network, long-distance   Cutoff, U (GLO)                             |                             |
|  |  | Transmission losses (high-to-medium voltage): 0.37%<br>N <sub>2</sub> O emission: 5.0E-6 kg/kWh<br>Ozone emissions: 4.1577E-6 kg/kWh<br>SF6 emissions: 1.13E-7 kg/kWh | see market for electricity, medium voltage   electricity, medium voltage   Cutoff, U(DE)                                           |                             |
|  |  |                                                                                                                                                                       |                                                                                                                                    |                             |

**Table S10: Life cycle inventory for a 1 MW<sub>th</sub> SNG plant.**

| Inventory                                                             | Value                                                                                                                               | Name of data set (ecoinvent 3.7.1 cut-off)                                                                                     | Source             |
|-----------------------------------------------------------------------|-------------------------------------------------------------------------------------------------------------------------------------|--------------------------------------------------------------------------------------------------------------------------------|--------------------|
| <b>CO<sub>2</sub> compression (1 bar to 55 bar)</b>                   |                                                                                                                                     |                                                                                                                                |                    |
| CO <sub>2</sub> captured                                              | 1.044 kg CO <sub>2</sub> /kg CO <sub>2</sub> compressed                                                                             | -                                                                                                                              | Process simulation |
| Electricity                                                           | 0.125 kWh/kg CO <sub>2</sub> compressed                                                                                             | defined by electricity scenario (see Tab. S-4)                                                                                 | Process simulation |
| Reinforcing steel for HX-5 (see Fig. 2-2)                             | 0.274 kg/kg CO <sub>2</sub> compressed and per overall SNG plant operating time in h                                                | market for reinforcing steel I reinforcing steel I Cutoff, U-GLO                                                               | Process simulation |
| <b>CO<sub>2</sub> transportation</b>                                  |                                                                                                                                     |                                                                                                                                |                    |
| CO <sub>2</sub> compressed                                            | 1 kg CO <sub>2</sub> /kg CO <sub>2</sub> transported                                                                                | -                                                                                                                              |                    |
| Transport per lorry                                                   | 0.05 t*km/kg CO <sub>2</sub> transported                                                                                            | transport, freight, lorry 7.5 – 16 metric ton, EURO 6 I transport, freight, lorry 7.5 – 16 metric ton, EURO 6 I Cutoff, U -RER | Assumption         |
| <b>Methanation unit</b>                                               |                                                                                                                                     |                                                                                                                                |                    |
| Aluminum oxide (part of catalyst)                                     | 0.715 kg Aluminum oxide/kg SNG and per yearly SNG plant full load hours<br>Assumption: replacement every 2 years of plant operation | market for aluminium oxide, non-metallurgical I aluminium oxide, non-metallurgical I Cutoff, U- IAI Area, EU27 & EFTA          | Process simulation |
| CO <sub>2</sub> compressed, transported                               | 1.73 kg CO <sub>2</sub> /kg SNG                                                                                                     | -                                                                                                                              | Process simulation |
| H <sub>2</sub>                                                        | 0.317 kg H <sub>2</sub> /kg SNG                                                                                                     | defined by H <sub>2</sub> source in scenario                                                                                   | Process simulation |
| Reinforcing steel for R-1, R-2, HX-1, HX-2, HX-3, ST-1 (see Fig. 2-2) | 11.09 kg/kg SNG and per overall SNG plant operating time in h                                                                       | market for reinforcing steel I reinforcing steel I Cutoff,U-GLO                                                                | Process simulation |
| <b>SNG Upgrading (to 30 °C, 16 bar)</b>                               |                                                                                                                                     |                                                                                                                                |                    |
| Electricity                                                           | 0.053 kWh/kg SNG upgraded                                                                                                           | defined by electricity scenario (see Tab. S-4)                                                                                 | Process simulation |



|                                                 |                                                                        |                                                                    |                    |
|-------------------------------------------------|------------------------------------------------------------------------|--------------------------------------------------------------------|--------------------|
| SNG                                             | 1.573 kg SNG/kg SNG upgraded                                           | -                                                                  | Process simulation |
| Reinforcing steel for HX-4, ST-2 (see Fig. 2-2) | 3.538 kg/kg SNG upgraded and per overall SNG plant operating time in h | market for reinforcing steel I<br>reinforcing steel I Cutoff,U-GLO | Process simulation |

## References

- [1] Peters MS, Timmerhaus KD, West RE. Plant Design and Economics for Chemical Engineers. 5th ed. New York: McGraw-Hill Education; 2003. 9780072392661.
- [2] Ulrich GD, Vasudevan PT. Chemical Engineering Process Design and Economics: A Practical Guide. 2nd ed. Ebook: Taylor & Francis Group; 2004. 9780849320330.
- [3] NOW GmbH. Studie IndWEDe – Kurzfassung Industrialisierung der Wasserelektrolyse in Deutschland: Chancen und Herausforderungen für nachhaltigen Wasserstoff für Verkehr, Strom und Wärme. In: Berlin, Germany; 2018.
- [4] Gas Technology Institute. Emerging and Existing Oxygen Production Technology Scan and Evaluation. In: Illinois, USA; 2018.
- [5] Herbes C, Halbes V, Braun L. Preise für die Abgabe von Wärme aus Biogasanlagen an Dritte. Agrar-Steuern. 2018;12-5.
- [6] Becker WL, Penev M, Braun RJ. Production of Synthetic Natural Gas From Carbon Dioxide and Renewably Generated Hydrogen: A Techno-Economic Analysis of a Power-to-Gas Strategy. Journal of Energy Resources Technology. 2018;141. 10.1115/1.4041381.
- [7] Benjaminsson G, Benjaminsson J, Rudberg R. Power-to-Gas – A technical review. Malmö: Svenskt Gastekniskt Center AB. 2013.
- [8] De Saint Jean M, Baurens P, Bouallou C, Couturier K. Economic assessment of a power-to-substitute-natural-gas process including high-temperature steam electrolysis. International Journal of Hydrogen Energy. 2015;40:6487-500. <https://doi.org/10.1016/j.ijhydene.2015.03.066>.
- [9] Giglio E, Lanzini A, Santarelli M, Leone P. Synthetic natural gas via integrated high-temperature electrolysis and methanation: Part II—Economic analysis. Journal of Energy Storage. 2015;2:64-79. <https://doi.org/10.1016/j.est.2015.06.004>.
- [10] Jentsch M, Trost T, Sterner M. Optimal Use of Power-to-Gas Energy Storage Systems in an 85% Renewable Energy Scenario. Energy Procedia. 2014;46:254-61. <https://doi.org/10.1016/j.egypro.2014.01.180>.
- [11] Mohseni F, Görling M, Alvfors P. The competitiveness of synthetic natural gas as a propellant in the Swedish fuel market. Energy Policy. 2013;52:810-8. <https://doi.org/10.1016/j.enpol.2012.10.049>.
- [12] Parra D, Patel MK. Techno-economic implications of the electrolyser technology and size for power-to-gas systems. International Journal of Hydrogen Energy. 2016;41:3748-61. <https://doi.org/10.1016/j.ijhydene.2015.12.160>.
- [13] Peters R, Baltruweit M, Grube T, Samsun RC, Stolten D. A techno economic analysis of the power to gas route. Journal of CO2 Utilization. 2019;34:616-34. <https://doi.org/10.1016/j.jcou.2019.07.009>.
- [14] Schiebahn S, Grube T, Robinius M, Tietze V, Kumar B, Stolten D. Power to gas: Technological overview, systems analysis and economic assessment for a case study in Germany. International Journal of Hydrogen Energy. 2015;40:4285-94. <https://doi.org/10.1016/j.ijhydene.2015.01.123>.
- [15] Tremel A, Wasserscheid P, Baldauf M, Hammer T. Techno-economic analysis for the synthesis of liquid and gaseous fuels based on hydrogen production via electrolysis. International Journal of Hydrogen Energy. 2015;40:11457-64. <https://doi.org/10.1016/j.ijhydene.2015.01.097>.
- [16] Tichler R, Steinmüller H, Reiter G. Teilprojekt D "Wirtschaftlichkeit und Systemanalyse von Power-to-Gas-Konzepten. In: Bonn, Germany; 2014.
- [17] Eurostat. Gas prices for household consumers - bi-annual data (from 2007 onwards). 2020 [https://ec.europa.eu/eurostat/databrowser/view/nrg\\_pc\\_202/default/table?lang=en](https://ec.europa.eu/eurostat/databrowser/view/nrg_pc_202/default/table?lang=en)
- [18] Eurostat. Gas prices for non-household consumers - bi-annual data (from 2007 onwards). 2020 [https://ec.europa.eu/eurostat/databrowser/view/NRG\\_PC\\_203/default/table?lang=en&category=nrg.nrg\\_price.nrg\\_pc](https://ec.europa.eu/eurostat/databrowser/view/NRG_PC_203/default/table?lang=en&category=nrg.nrg_price.nrg_pc)
- [19] BAFA BfWuA. Monatliche Entwicklung des Grenzübergangspreises ab 1991. In: Erdgasstatistik, editor. Erschborn2020
- [20] Umweltbundesamt. Erneuerbare Energien in Deutschland - Daten zur Entwicklung im Jahr 2020. In: Dessau-roßlau, Germany; 2021.
- [21] BMWi. Zeitreihen zur Entwicklung der erneuerbaren Energien in Deutschland. In: Dessau-Roßlau, Germany; 2021.

[22] EWI Energy Research and Scenarios. The energy market in 2030 and 2050 – The contribution of gas and heat infrastructure to efficient carbon emission reductions. In: Köln; 2018.
